# Supplementary material for: The Complete Mitogenome of Toxocara vitulorum: Novel In-Sights into the Phylogenetics in Toxocaridae
Source: MDPI journal article supplement (doi:10.3390/ani12243546), 2022-12-15
Supplement: s1 [file s1]

**Table S1.** List of the eight primer pairs for PCR amplification and their positions in the mitogenome of *Toxocara vitulorum*

| Primer name | Location based<br>on <i>T. vitulorum</i> mitogenome | Primer sequence (5' to 3') |                                 |
|-------------|-----------------------------------------------------|----------------------------|---------------------------------|
| Tv-1        | 14907~14932<br>1393~1404                            | Forward:                   | CACGAATGTGTACTAAATAATAAATA      |
|             |                                                     | Reverse:                   | CGGTCAAAGCCAAAGG                |
| Tv-2        | 1042~1069<br>2870~2897                              | Forward:                   | CAGTTTTTGTTTTATTTGAAGGAAGGTA    |
|             |                                                     | Reverse:                   | CTTTCTAGAAGGCAAACCTAACCAACCATA  |
| Tv-3        | 2574~2598<br>4772~4799                              | Forward:                   | GTTGTTCCCTTGACGGTGGTTTTTG       |
|             |                                                     | Reverse:                   | CTAAAGCAGCCCAAACACAATACAACCT    |
| Tv-4        | 4371~4390<br>7229~7253                              | Forward:                   | TTTTGGGGTGCCGTTACTTA            |
|             |                                                     | Reverse:                   | TAAACAGGAAAAATAAACCAAGCAC       |
| Tv-5        | 6838~6868<br>9560~9589                              | Forward:                   | GACTGATCGTAATTTGAATACTTCTTTTTTT |
|             |                                                     | Reverse:                   | TACTAAAAGAAGAACAGTCTAAAACCCCA   |
| Tv-6        | 9220~9240<br>11359~11379                            | Forward:                   | GAGGACATTAAGGTAGCAAAA           |
|             |                                                     | Reverse:                   | TAAAAAAGACAAAGGAGCAAA           |
| Tv-7        | 10973~10996<br>13453~13475                          | Forward:                   | AGCAGGATGGTCGTAATTATAGTA        |
|             |                                                     | Reverse:                   | TTTCACAAATTTTTTCGAGACA          |
| Tv-8        | 13222~13242<br>14778~15021                          | Forward:                   | GCCTATAGGGGAGTAAGTTGT           |
|             |                                                     | Reverse:                   | ATAAGTAAAGGTATATAAGGGGTT        |
