# Supplementary material for: The Complete Mitogenome of Toxocara vitulorum: Novel In-Sights into the Phylogenetics in Toxocaridae
Source: MDPI journal article supplement (doi:10.3390/ani12243546), 2022-12-15
Supplement: s1 [file s1]

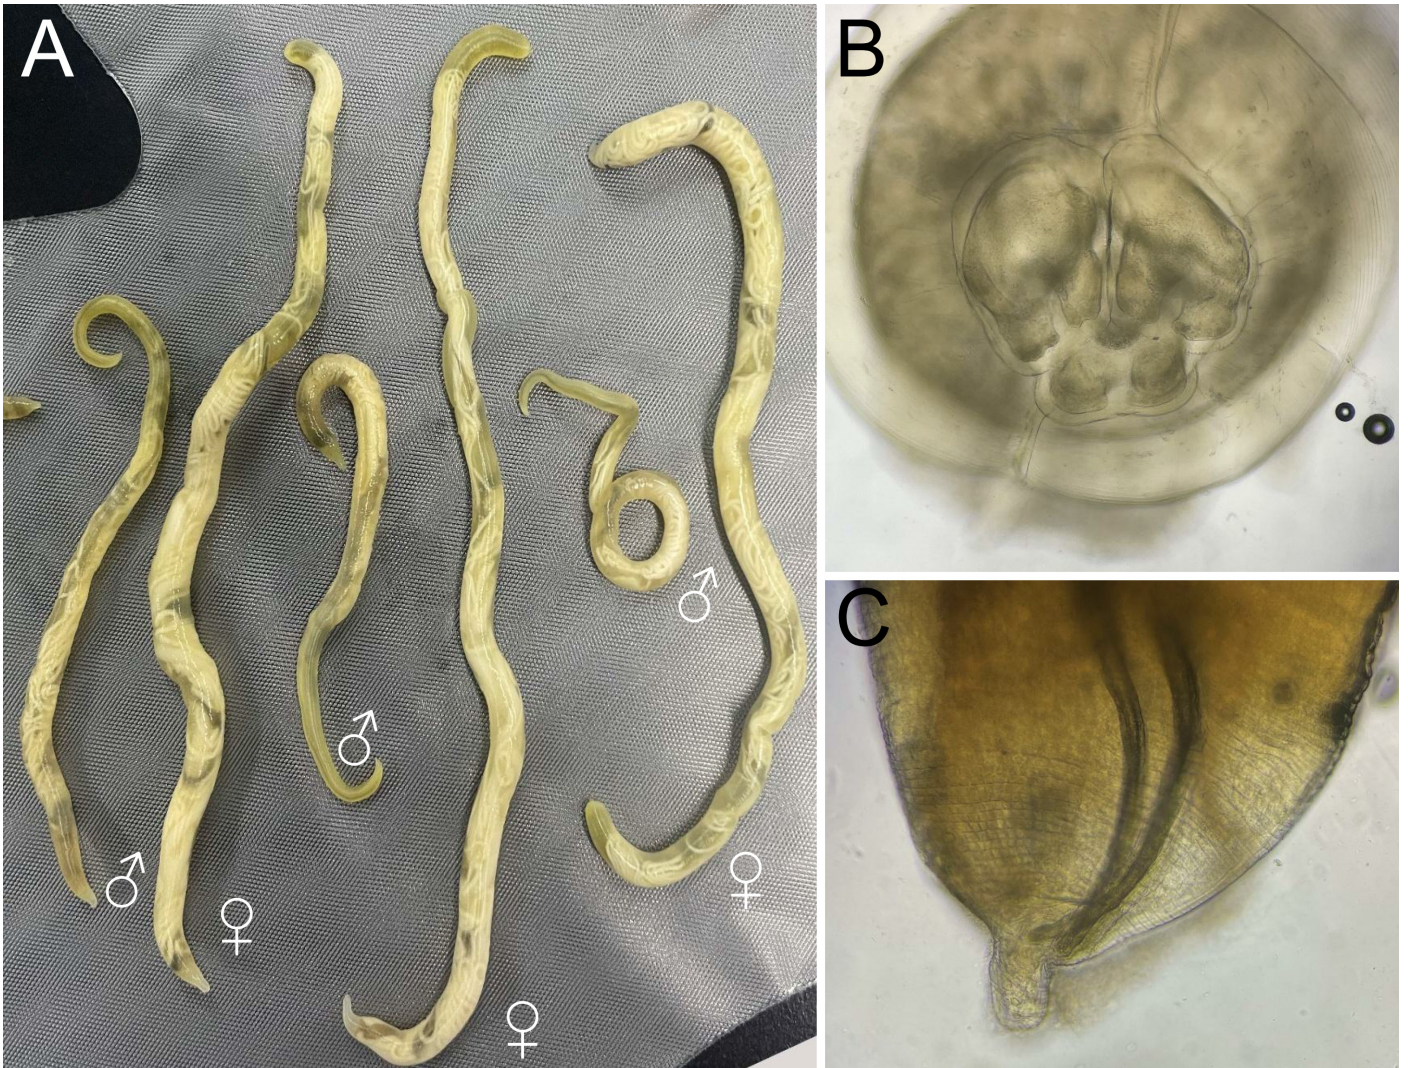

**Figure S1.** Morphological photomicrographs of *Toxocara vitulorum* adults. (A) Total view of *T. vitulorum* adults, (B) Cephalic extremity with three lips and dentiform ridges (10×), and (C) Caudal extremity (10×).

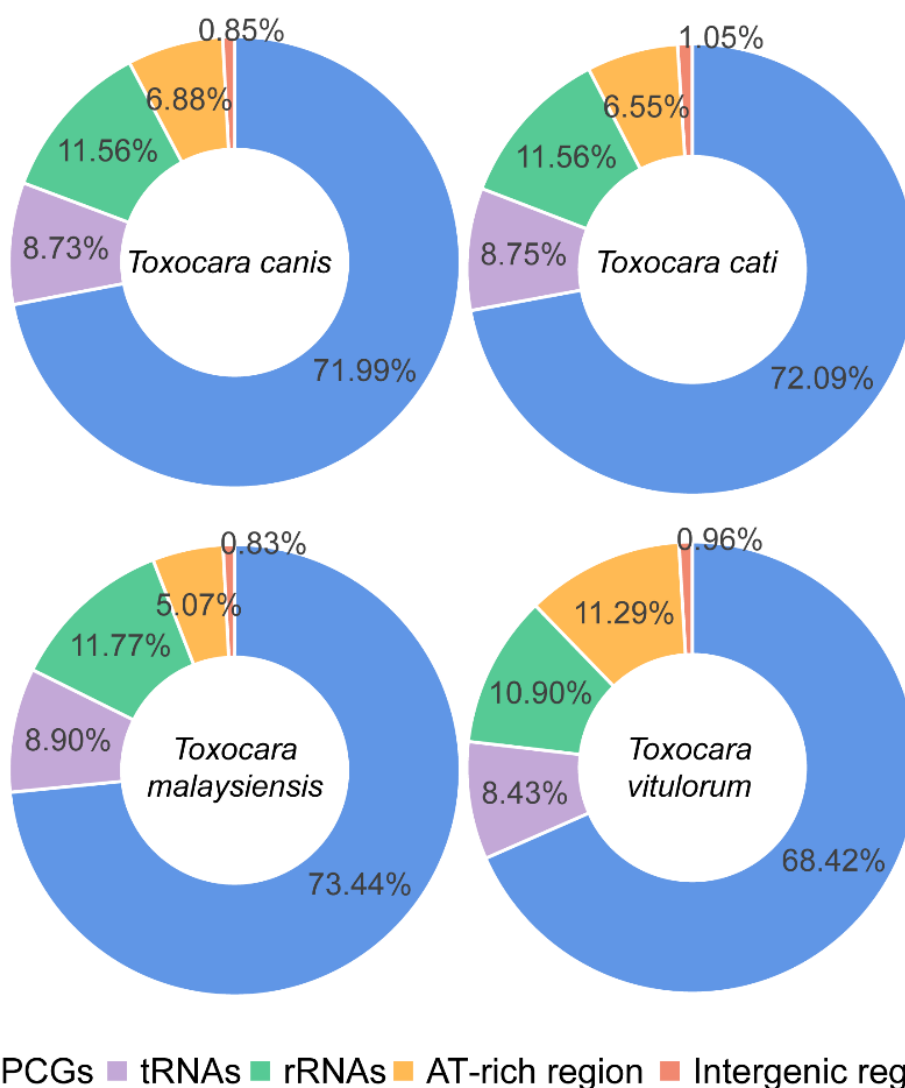

**Figure S2.** The proportion of the mitogenomes comprised by PCGs, tRNAs, rRNAs, and AT-rich and intergenic regions for *Toxocara* species.
