# Supplementary material for: The Complete Mitogenome of Toxocara vitulorum: Novel In-Sights into the Phylogenetics in Toxocaridae
Source: MDPI journal article supplement (doi:10.3390/ani12243546), 2022-12-15
Supplement: s1 [file s1]

**Table S2.** Nucleotide compositions of different genomic regions in *Toxocara vitulorum* and other nematodes reported within Ascaridida

| Species                             |          | ALL    | PCGs   | tRNA   | rRNA   | 3rd    | cytb   | cox1   | cox2   | cox3   | nad1   | nad2   | nad3   | nad4   | nad4L  | nad5   | nad6   | atp6   |
|-------------------------------------|----------|--------|--------|--------|--------|--------|--------|--------|--------|--------|--------|--------|--------|--------|--------|--------|--------|--------|
| <i>Ascaridia</i> sp.<br>GHL-2013    | A+T%     | 67.100 | 66.150 | 66.880 | 67.580 | 67.000 | 65.310 | 65.790 | 64.050 | 66.180 | 65.400 | 69.420 | 66.670 | 67.150 | 70.040 | 65.590 | 69.650 | 66.670 |
|                                     | A-T skew | -0.398 | -0.463 | -0.170 | -0.262 | -0.433 | -0.444 | -0.373 | -0.391 | -0.517 | -0.487 | -0.511 | -0.504 | -0.438 | -0.487 | -0.528 | -0.558 | -0.492 |
|                                     | G+C%     | 32.900 | 33.850 | 33.120 | 32.420 | 32.900 | 34.690 | 34.210 | 35.960 | 33.830 | 34.600 | 30.580 | 33.330 | 32.850 | 29.950 | 34.410 | 30.350 | 33.340 |
|                                     | G-C skew | 0.562  | 0.576  | 0.541  | 0.516  | 0.587  | 0.539  | 0.446  | 0.555  | 0.535  | 0.601  | 0.711  | 0.841  | 0.505  | 0.816  | 0.679  | 0.727  | 0.578  |
| <i>Anisakis sim-<br/>plex</i> (s.l) | A+T%     | 71.200 | 69.540 | 71.900 | 76.070 | 71.800 | 67.880 | 66.120 | 66.950 | 66.320 | 68.160 | 73.290 | 75.300 | 69.910 | 76.730 | 72.060 | 71.260 | 70.670 |
|                                     | A-T skew | -0.357 | -0.429 | -0.174 | -0.242 | -0.421 | -0.442 | -0.413 | -0.372 | -0.492 | -0.462 | -0.442 | -0.407 | -0.421 | -0.371 | -0.414 | -0.516 | -0.401 |
|                                     | G+C%     | 28.800 | 30.460 | 28.090 | 23.930 | 28.400 | 32.120 | 33.880 | 33.050 | 33.680 | 31.840 | 26.720 | 24.700 | 30.090 | 23.280 | 27.940 | 28.730 | 29.330 |
|                                     | G-C skew | 0.319  | 0.310  | 0.316  | 0.380  | 0.359  | 0.303  | 0.270  | 0.359  | 0.318  | 0.317  | 0.354  | 0.518  | 0.227  | 0.333  | 0.308  | 0.296  | 0.386  |
| <i>Anisakis sim-<br/>plex</i> (s.s) | A+T%     | 70.745 | 69.660 | 69.750 | 76.100 | 71.198 | 66.670 | 66.110 | 67.090 | 66.890 | 67.930 | 73.870 | 75.590 | 69.350 | 78.450 | 73.010 | 72.640 | 70.500 |
|                                     | A-T skew | -0.362 | -0.430 | -0.182 | -0.237 | -0.415 | -0.455 | -0.409 | -0.369 | -0.487 | -0.452 | -0.456 | -0.409 | -0.421 | -0.374 | -0.411 | -0.519 | -0.409 |
|                                     | G+C%     | 29.255 | 30.340 | 30.250 | 23.910 | 28.802 | 33.340 | 33.890 | 56.650 | 33.110 | 32.080 | 26.120 | 24.400 | 30.650 | 21.560 | 27.000 | 27.360 | 29.500 |
|                                     | G-C skew | 0.326  | 0.316  | 0.342  | 0.389  | 0.372  | 0.292  | 0.266  | 0.621  | 0.336  | 0.302  | 0.394  | 0.537  | 0.220  | 0.400  | 0.321  | 0.361  | 0.412  |
| <i>Ascaridia colum-<br/>bae</i>     | A+T%     | 71.100 | 70.240 | 71.170 | 71.830 | 71.900 | 68.670 | 68.770 | 67.390 | 69.940 | 67.920 | 72.360 | 72.030 | 71.920 | 76.960 | 72.610 | 73.100 | 70.350 |
|                                     | A-T skew | -0.280 | -0.331 | -0.079 | -0.172 | -0.252 | -0.336 | -0.269 | -0.305 | -0.405 | -0.382 | -0.377 | -0.264 | -0.303 | -0.317 | -0.328 | -0.415 | -0.390 |
|                                     | G+C%     | 28.900 | 29.750 | 28.830 | 28.170 | 28.000 | 31.330 | 31.220 | 32.610 | 30.060 | 32.080 | 27.640 | 27.970 | 28.070 | 23.040 | 27.390 | 26.900 | 29.650 |
|                                     | G-C skew | 0.453  | 0.456  | 0.474  | 0.465  | 0.436  | 0.426  | 0.328  | 0.471  | 0.464  | 0.552  | 0.528  | 0.745  | 0.360  | 0.680  | 0.520  | 0.572  | 0.469  |
| <i>Ascaridia galli</i>              | A+T%     | 71.500 | 70.330 | 73.390 | 72.840 | 72.800 | 69.020 | 67.440 | 68.830 | 70.600 | 68.260 | 74.260 | 70.830 | 72.420 | 76.960 | 72.170 | 74.250 | 40.040 |
|                                     | A-T skew | -0.415 | -0.479 | -0.192 | -0.279 | -0.484 | -0.470 | -0.397 | -0.403 | -0.506 | -0.539 | -0.530 | -0.588 | -0.468 | -0.437 | -0.502 | -0.585 | -0.113 |
|                                     | G+C%     | 28.400 | 29.680 | 26.600 | 27.160 | 27.100 | 30.970 | 32.570 | 31.180 | 29.400 | 31.730 | 25.750 | 29.170 | 27.590 | 23.040 | 27.830 | 25.750 | 29.970 |
|                                     | G-C skew | 0.486  | 0.496  | 0.489  | 0.467  | 0.587  | 0.450  | 0.360  | 0.484  | 0.525  | 0.525  | 0.640  | 0.816  | 0.443  | 0.760  | 0.572  | 0.661  | 0.463  |
| <i>Ascaris lumbricoides</i>         | A+T%     | 71.684 | 70.110 | 70.550 | 76.570 | 72.813 | 66.890 | 66.980 | 68.530 | 69.110 | 69.070 | 72.390 | 72.610 | 69.110 | 76.070 | 72.740 | 74.250 | 70.670 |
|                                     | A-T skew | -0.384 | -0.474 | -0.192 | -0.284 | -0.443 | -0.504 | -0.459 | -0.378 | -0.497 | -0.489 | -0.532 | -0.500 | -0.497 | -0.438 | -0.455 | -0.511 | -0.443 |
|                                     | G+C%     | 28.316 | 29.890 | 29.450 | 23.440 | 27.187 | 33.100 | 33.010 | 31.470 | 30.890 | 30.920 | 27.600 | 27.380 | 30.890 | 23.930 | 27.250 | 25.750 | 29.330 |
|                                     | G-C skew | 0.440  | 0.450  | 0.401  | 0.467  | 0.554  | 0.455  | 0.394  | 0.464  | 0.400  | 0.422  | 0.562  | 0.761  | 0.400  | 0.750  | 0.472  | 0.446  | 0.500  |
| <i>Ascaris lumbricoides</i>         | A+T%     | 71.823 | 70.020 | 71.120 | 74.410 | 72.899 | 68.850 | 66.860 | 68.960 | 68.880 | 69.640 | 72.870 | 72.610 | 70.000 | 76.490 | 72.680 | 73.790 | 71.170 |
|                                     | A-T skew | -0.385 | -0.473 | -0.179 | -0.214 | -0.450 | -0.497 | -0.456 | -0.369 | -0.501 | -0.490 | -0.532 | -0.500 | -0.484 | -0.430 | -0.457 | -0.520 | -0.447 |
|                                     | G+C%     | 28.177 | 29.990 | 28.880 | 25.590 | 27.101 | 31.150 | 33.150 | 31.040 | 31.120 | 30.360 | 27.130 | 27.380 | 30.000 | 23.500 | 27.320 | 26.210 | 28.830 |
|                                     | G-C skew | 0.446  | 0.456  | 0.424  | 0.407  | 0.493  | 0.479  | 0.392  | 0.456  | 0.406  | 0.441  | 0.589  | 0.761  | 0.355  | 0.746  | 0.474  | 0.456  | 0.526  |
| <i>Ascaris</i> sp.(cA.)             | A+T%     | 71.700 | 69.980 | 70.910 | 74.290 | 74.700 | 68.490 | 67.160 | 68.810 | 68.850 | 69.420 | 72.750 | 72.610 | 70.240 | 76.920 | 72.430 | 73.790 | 71.500 |

| Genomic and Phylogenetic Analysis of Ascaris and Baylisascaris Species |          |                 |        |          |            |                      |           |         |          |                 |        |          |            |                      |           |         |          |               |
|------------------------------------------------------------------------|----------|-----------------|--------|----------|------------|----------------------|-----------|---------|----------|-----------------|--------|----------|------------|----------------------|-----------|---------|----------|---------------|
| Species                                                                |          | Genomic Metrics |        |          |            | Phylogenetic Support |           |         |          | Genomic Metrics |        |          |            | Phylogenetic Support |           |         |          | Overall Score |
|                                                                        |          | A-T skew        | G+C%   | G-C skew | GC Content | Posterior Prob.      | Bootstrap | SH-Like | Bayesian | A-T skew        | G+C%   | G-C skew | GC Content | Posterior Prob.      | Bootstrap | SH-Like | Bayesian |               |
| Ascaris sp.(gA.)                                                       | A-T skew | -0.386          | -0.473 | -0.177   | -0.214     | -0.473               | -0.503    | -0.454  | -0.376   | -0.495          | -0.492 | -0.531   | -0.500     | -0.484               | -0.422    | -0.458  | -0.520   | -0.445        |
|                                                                        | G+C%     | 28.200          | 30.010 | 29.090   | 25.710     | 25.700               | 31.520    | 32.850  | 31.190   | 31.140          | 30.580 | 27.250   | 27.380     | 29.750               | 23.080    | 27.570  | 26.210   | 28.500        |
|                                                                        | G-C skew | 0.447           | 0.455  | 0.423    | 0.405      | 0.525                | 0.480     | 0.390   | 0.468    | 0.389           | 0.438  | 0.582    | 0.761      | 0.361                | 0.741     | 0.469   | 0.456    | 0.532         |
|                                                                        | A+T%     | 71.900          | 70.060 | 70.880   | 74.280     | 72.500               | 68.580    | 66.970  | 68.950   | 69.240          | 69.420 | 72.980   | 72.610     | 70.330               | 76.070    | 72.620  | 73.790   | 71.330        |
| Ascaris suum                                                           | A-T skew | -0.385          | -0.473 | -0.178   | -0.213     | -0.352               | -0.501    | -0.453  | -0.373   | -0.498          | -0.495 | -0.532   | -0.500     | -0.484               | -0.438    | -0.456  | -0.520   | -0.444        |
|                                                                        | G+C%     | 28.200          | 29.940 | 29.120   | 25.660     | 27.600               | 31.420    | 33.040  | 31.050   | 30.760          | 30.590 | 27.010   | 27.380     | 29.670               | 23.930    | 27.390  | 26.210   | 28.660        |
|                                                                        | G-C skew | 0.447           | 0.456  | 0.418    | 0.413      | 0.384                | 0.478     | 0.382   | 0.465    | 0.406           | 0.446  | 0.596    | 0.761      | 0.364                | 0.750     | 0.470   | 0.456    | 0.523         |
|                                                                        | A+T%     | 71.812          | 70.450 | 70.790   | 76.250     | 73.270               | 68.850    | 66.730  | 68.810   | 70.010          | 73.790 | 73.460   | 72.610     | 70.330               | 76.070    | 72.740  | 73.790   | 71.000        |
| Ascaris suum                                                           | A-T skew | -0.385          | -0.473 | -0.188   | -0.284     | -0.436               | -0.503    | -0.455  | -0.372   | -0.500          | -0.520 | -0.526   | -0.500     | -0.484               | -0.438    | -0.455  | -0.520   | -0.441        |
|                                                                        | G+C%     | 28.188          | 29.540 | 29.200   | 23.750     | 26.730               | 31.140    | 33.270  | 31.190   | 29.980          | 26.210 | 26.540   | 27.380     | 29.670               | 23.930    | 27.250  | 26.210   | 29.000        |
|                                                                        | G-C skew | 0.452           | 0.465  | 0.418    | 0.465      | 0.539                | 0.491     | 0.387   | 0.459    | 0.434           | 0.456  | 0.607    | 0.761      | 0.364                | 0.750     | 0.472   | 0.456    | 0.506         |
|                                                                        | A+T%     | 72.000          | 70.360 | 71.960   | 76.740     | 71.500               | 68.400    | 66.710  | 68.820   | 70.440          | 69.530 | 72.990   | 73.810     | 70.980               | 76.500    | 72.940  | 72.640   | 71.340        |
| Ascaris suum                                                           | A-T skew | -0.383          | -0.470 | -0.183   | -0.280     | -0.371               | -0.505    | -0.449  | -0.380   | -0.490          | -0.483 | -0.529   | -0.484     | -0.478               | -0.441    | -0.448  | -0.513   | -0.449        |
|                                                                        | G+C%     | 28.100          | 29.490 | 28.040   | 23.260     | 28.300               | 31.610    | 33.230  | 31.180   | 29.550          | 30.470 | 27.010   | 26.190     | 29.030               | 23.500    | 27.070  | 27.360   | 28.670        |
|                                                                        | G-C skew | 0.452           | 0.460  | 0.434    | 0.462      | 0.456                | 0.481     | 0.378   | 0.477    | 0.427           | 0.436  | 0.596    | 0.772      | 0.367                | 0.782     | 0.459   | 0.395    | 0.535         |
|                                                                        | A+T%     | 70.455          | 68.410 | 69.580   | 71.990     | 70.895               | 67.930    | 65.520  | 65.670   | 67.450          | 66.210 | 70.970   | 43.460     | 69.020               | 76.490    | 70.350  | 77.010   | 67.500        |
| Baylisascaris pro-cyonis                                               | A-T skew | -0.377          | -0.483 | -0.167   | -0.229     | -0.447               | -0.508    | -0.453  | -0.420   | -0.502          | -0.498 | -0.543   | -0.178     | -0.470               | -0.419    | -0.469  | -0.504   | -0.491        |
|                                                                        | G+C%     | 29.545          | 31.580 | 30.420   | 28.000     | 29.105               | 32.070    | 34.470  | 34.330   | 32.560          | 33.790 | 29.030   | 56.540     | 30.980               | 23.500    | 29.650  | 22.990   | 32.500        |
|                                                                        | G-C skew | 0.449           | 0.466  | 0.383    | 0.434      | 0.524                | 0.476     | 0.397   | 0.483    | 0.392           | 0.464  | 0.608    | 0.842      | 0.354                | 0.746     | 0.498   | 0.480    | 0.549         |
|                                                                        | A+T%     | 68.622          | 66.730 | 68.330   | 71.240     | 68.595               | 64.410    | 64.190  | 63.660   | 66.020          | 66.100 | 70.030   | 72.620     | 67.560               | 70.940    | 68.710  | 73.330   | 67.340        |
| Baylisascaris schroederi                                               | A-T skew | -0.384          | -0.486 | -0.172   | -0.318     | -0.351               | -0.506    | -0.447  | -0.416   | -0.523          | -0.484 | -0.546   | -0.484     | -0.497               | -0.482    | -0.495  | -0.549   | -0.490        |
|                                                                        | G+C%     | 31.378          | 33.270 | 31.660   | 28.760     | 31.405               | 35.600    | 35.810  | 36.340   | 33.990          | 33.910 | 29.980   | 27.380     | 32.440               | 29.060    | 31.290  | 26.670   | 32.670        |
|                                                                        | G-C skew | 0.457           | 0.475  | 0.445    | 0.509      | 0.325                | 0.462     | 0.402   | 0.488    | 0.425           | 0.466  | 0.620    | 0.717      | 0.348                | 0.706     | 0.500   | 0.431    | 0.592         |
|                                                                        | A+T%     | 69.446          | 67.220 | 67.520   | 70.690     | 68.043               | 65.490    | 65.080  | 64.520   | 66.930          | 65.640 | 70.620   | 71.720     | 68.300               | 73.940    | 69.400  | 72.870   | 66.500        |
| Baylisascaris transfuga                                                | A-T skew | -0.375          | -0.478 | -0.174   | -0.230     | -0.446               | -0.490    | -0.443  | -0.415   | -0.494          | -0.473 | -0.527   | -0.452     | -0.493               | -0.457    | -0.489  | -0.539   | -0.489        |
|                                                                        | G+C%     | 30.554          | 32.780 | 32.480   | 29.310     | 31.957               | 34.500    | 34.920  | 35.480   | 33.080          | 34.370 | 29.390   | 28.270     | 31.710               | 26.070    | 30.600  | 27.130   | 33.500        |
|                                                                        | G-C skew | 0.447           | 0.463  | 0.401    | 0.432      | 0.444                | 0.456     | 0.397   | 0.508    | 0.409           | 0.447  | 0.605    | 0.642      | 0.348                | 0.705     | 0.505   | 0.390    | 0.552         |
|                                                                        | A+T%     | 71.246          | 70.630 | 71.730   | 75.180     | 72.377               | 70.570    | 68.650  | 69.830   | 69.720          | 68.040 | 72.840   | 70.960     | 72.110               | 75.640    | 72.040  | 73.610   | 67.670        |
| Heterakis be-ramporia                                                  | A-T skew | -0.318          | -0.376 | -0.122   | -0.259     | -0.308               | -0.362    | -0.284  | -0.317   | -0.416          | -0.413 | -0.427   | -0.409     | -0.391               | -0.424    | -0.396  | -0.434   | -0.360        |
|                                                                        | G+C%     | 28.754          | 29.370 | 28.270   | 24.820     | 27.623               | 29.430    | 31.350  | 30.170   | 30.290          | 31.960 | 27.160   | 29.040     | 27.890               | 24.360    | 27.960  | 26.390   | 32.330        |
|                                                                        | G-C skew | 0.462           | 0.474  | 0.449    | 0.561      | 0.485                | 0.392     | 0.314   | 0.419    | 0.500           | 0.500  | 0.624    | 0.815      | 0.423                | 0.684     | 0.570   | 0.632    | 0.381         |
|                                                                        | A+T%     | 69.842          | 69.310 | 70.760   | 74.110     | 72.407               | 68.880    | 67.820  | 67.250   | 68.320          | 65.750 | 72.600   | 70.960     | 70.490               | 72.220    | 70.270  | 74.080   | 67.840        |
| Heterakis galli-narum                                                  | A-T skew | -0.336          | -0.395 | -0.151   | -0.284     | -0.338               | -0.377    | -0.272  | -0.355   | -0.412          | -0.462 | -0.444   | -0.460     | -0.400               | -0.456    | -0.429  | -0.469   | -0.388        |
|                                                                        | G+C%     | 30.158          | 30.690 | 29.240   | 25.890     | 27.593               | 31.120    | 32.190  | 32.760   | 31.690          | 34.240 | 27.410   | 29.040     | 29.520               | 27.780    | 29.720  | 25.920   | 32.160        |

| Genomic and Nucleotide Composition Metrics |          |                |                |         |         |         |         |         |         |         |         |         |         |         |         |         |         |         |
|--------------------------------------------|----------|----------------|----------------|---------|---------|---------|---------|---------|---------|---------|---------|---------|---------|---------|---------|---------|---------|---------|
| Species                                    | Metric   | GC Content (%) | AT Content (%) | GC Skew | AT Skew | GC Bias | AT Bias | GC Skew | AT Skew | GC Bias | AT Bias | GC Skew | AT Skew | GC Bias | AT Bias | GC Skew | AT Skew | GC Bias |
| <i>Parascaris equorum</i>                  | G-C skew | 0.449          | 0.462          | 0.475   | 0.539   | 0.437   | 0.430   | 0.284   | 0.482   | 0.448   | 0.513   | 0.541   | 0.753   | 0.377   | 0.662   | 0.562   | 0.590   | 0.427   |
|                                            | A+T%     | 70.250         | 70.770         | 69.950  | 73.920  | 69.400  | 69.020  | 73.970  | 66.520  | 69.400  | 69.970  | 74.170  | 69.640  | 69.350  | 76.070  | 70.280  | 72.180  | 70.340  |
|                                            | A-T skew | 0.384          | -0.393         | -0.152  | -0.295  | -0.366  | -0.446  | -0.518  | -0.368  | -0.490  | -0.449  | -0.483  | -0.513  | -0.451  | -0.416  | -0.436  | -0.503  | -0.498  |
|                                            | G+C%     | 29.800         | 29.230         | 30.040  | 26.070  | 30.200  | 30.980  | 26.030  | 33.480  | 30.590  | 30.020  | 25.830  | 30.360  | 30.650  | 23.930  | 29.710  | 27.820  | 29.670  |
| <i>Parascaris univale</i>                  | G-C skew | 0.450          | 0.455          | 0.413   | 0.530   | 0.490   | 0.409   | 0.411   | 0.504   | 0.413   | 0.445   | 0.550   | 0.725   | 0.305   | 0.750   | 0.499   | 0.388   | 0.517   |
|                                            | A+T%     | 70.575         | 69.270         | 69.840  | 72.340  | 71.336  | 69.230  | 65.580  | 66.380  | 69.270  | 69.860  | 74.350  | 69.640  | 71.060  | 76.070  | 70.670  | 72.640  | 70.340  |
|                                            | A+T%     | -0.385         | -0.449         | -0.156  | -0.222  | -0.443  | -0.449  | -0.423  | -0.366  | -0.477  | -0.451  | -0.481  | -0.513  | -0.471  | -0.416  | -0.445  | -0.506  | -0.498  |
|                                            | A-T skew | 29.425         | 30.730         | 30.160  | 27.660  | 28.664  | 30.770  | 34.420  | 33.620  | 30.720  | 30.130  | 25.640  | 30.360  | 28.940  | 23.930  | 29.330  | 27.360  | 29.670  |
| <i>Pseudoterranova azarasi</i>             | G+C%     | 0.454          | 0.471          | 0.432   | 0.448   | 0.481   | 0.407   | 0.415   | 0.498   | 0.398   | 0.447   | 0.551   | 0.725   | 0.309   | 0.750   | 0.508   | 0.428   | 0.517   |
|                                            | A+T%     | 70.711         | 69.420         | 71.530  | 75.240  | 69.963  | 67.520  | 64.970  | 67.090  | 68.800  | 68.270  | 73.880  | 72.920  | 70.250  | 76.730  | 70.830  | 74.710  | 69.500  |
|                                            | A-T skew | -0.369         | -0.439         | -0.151  | -0.258  | -0.352  | -0.433  | -0.422  | -0.359  | -0.457  | -0.483  | -0.443  | -0.478  | -0.437  | -0.393  | -0.440  | -0.514  | -0.424  |
|                                            | G+C%     | 29.289         | 30.580         | 28.470  | 24.760  | 30.037  | 32.480  | 35.030  | 32.900  | 31.200  | 31.730  | 26.120  | 27.080  | 29.760  | 23.270  | 29.170  | 25.290  | 30.500  |
| <i>Pseudoterranova cattani</i>             | G-C skew | 0.342          | 0.347          | 0.345   | 0.435   | 0.363   | 0.291   | 0.297   | 0.351   | 0.339   | 0.307   | 0.412   | 0.671   | 0.284   | 0.519   | 0.368   | 0.491   | 0.366   |
|                                            | A+T%     | 71.075         | 69.850         | 71.830  | 75.130  | 69.800  | 66.600  | 65.550  | 68.520  | 69.580  | 68.610  | 74.350  | 75.300  | 70.000  | 75.860  | 71.840  | 73.790  | 70.670  |
|                                            | A-T skew | -0.362         | -0.431         | -0.155  | -0.251  | -0.289  | -0.433  | -0.423  | -0.351  | -0.441  | -0.439  | -0.437  | -0.431  | -0.435  | -0.409  | -0.439  | -0.489  | -0.434  |
|                                            | G+C%     | 28.925         | 30.150         | 28.470  | 24.870  | 30.100  | 33.390  | 34.460  | 31.490  | 30.410  | 31.390  | 25.650  | 24.700  | 30.000  | 24.140  | 28.160  | 26.210  | 29.330  |
| <i>Pseudoterranova krabbei</i>             | G-C skew | 0.336          | 0.350          | 0.333   | 0.418   | 0.289   | 0.348   | 0.319   | 0.348   | 0.313   | 0.299   | 0.392   | 0.687   | 0.263   | 0.572   | 0.354   | 0.403   | 0.432   |
|                                            | A+T%     | 70.343         | 68.960         | 71.160  | 70.230  | 69.171  | 41.380  | 64.720  | 66.950  | 67.630  | 68.270  | 73.520  | 75.000  | 69.410  | 74.570  | 70.450  | 73.560  | 69.830  |
|                                            | A-T skew | -0.352         | -0.445         | -0.147  | -0.124  | -0.324  | -0.114  | -0.441  | -0.357  | -0.463  | -0.470  | -0.460  | -0.445  | -0.436  | -0.410  | -0.448  | -0.500  | -0.446  |
|                                            | G+C%     | 29.657         | 31.050         | 28.830  | 29.770  | 30.829  | 33.940  | 35.280  | 33.050  | 32.380  | 31.730  | 26.480  | 25.000  | 30.410  | 25.440  | 29.540  | 26.440  | 30.160  |
| <i>Pseudoterranova bulbosa</i>             | G-C skew | 0.343          | 0.355          | 0.313   | 0.244   | 0.350   | 0.358   | 0.342   | 0.345   | 0.306   | 0.300   | 0.446   | 0.690   | 0.267   | 0.491   | 0.342   | 0.426   | 0.414   |
|                                            | A+T%     | 71.240         | 69.930         | 71.270  | 75.630  | 69.776  | 66.150  | 65.920  | 67.810  | 68.800  | 68.500  | 74.110  | 74.410  | 70.400  | 76.290  | 72.230  | 75.860  | 71.170  |
|                                            | A-T skew | -0.363         | -0.435         | -0.152  | -0.239  | -0.283  | -0.435  | -0.446  | -0.353  | -0.438  | -0.451  | -0.439  | -0.448  | -0.427  | -0.401  | -0.439  | -0.491  | -0.438  |
|                                            | G+C%     | 28.760         | 30.070         | 28.730  | 24.370  | 30.224  | 33.850  | 34.070  | 32.190  | 31.200  | 31.500  | 25.890  | 25.600  | 29.590  | 23.700  | 27.780  | 24.140  | 28.830  |
| <i>Toxascaris leonine</i>                  | G-C skew | 0.345          | 0.357          | 0.335   | 0.425   | 0.310   | 0.341   | 0.352   | 0.381   | 0.297   | 0.309   | 0.379   | 0.674   | 0.269   | 0.527   | 0.359   | 0.409   | 0.457   |
|                                            | A+T%     | 71.537         | 70.220         | 71.150  | 74.790  | 72.453  | 69.140  | 67.430  | 68.240  | 69.400  | 68.500  | 73.220  | 73.810  | 70.000  | 74.360  | 71.680  | 74.480  | 71.160  |
|                                            | A-T skew | -0.387         | -0.475         | -0.165  | -0.312  | -0.387  | -0.490  | -0.449  | -0.409  | -0.508  | -0.468  | -0.485  | -0.492  | -0.475  | -0.437  | -0.480  | -0.549  | -0.471  |
|                                            | G+C%     | 28.463         | 29.780         | 28.850  | 25.210  | 27.547  | 30.870  | 32.580  | 31.760  | 30.600  | 31.500  | 26.780  | 26.190  | 30.000  | 25.640  | 28.320  | 25.520  | 28.840  |
| <i>Toxascaris leonine</i>                  | G-C skew | 0.458          | 0.475          | 0.420   | 0.480   | 0.443   | 0.473   | 0.393   | 0.469   | 0.447   | 0.433   | 0.628   | 0.772   | 0.382   | 0.700   | 0.491   | 0.477   | 0.572   |
|                                            | A+T%     | 71.100         | 70.100         | 70.990  | 74.250  | 71.800  | 68.950  | 66.600  | 67.670  | 68.360  | 67.470  | 71.560  | 71.720  | 70.080  | 76.920  | 72.120  | 75.400  | 70.330  |
|                                            | A-T skew | -0.378         | -0.469         | -0.164  | -0.326  | -0.421  | -0.473  | -0.446  | -0.412  | -0.493  | -0.498  | -0.503  | -0.494  | -0.462  | -0.389  | -0.479  | -0.531  | -0.474  |
|                                            | G+C%     | 29.000         | 29.880         | 29.010  | 25.760  | 28.300  | 31.050  | 33.400  | 32.330  | 31.640  | 32.540  | 28.440  | 28.280  | 29.920  | 23.080  | 27.880  | 24.600  | 29.670  |
| <i>Toxocara canis</i>                      | G-C skew | 0.428          | 0.460          | 0.411   | 0.474   | 0.442   | 0.412   | 0.381   | 0.469   | 0.416   | 0.465   | 0.600   | 0.705   | 0.348   | 0.666   | 0.456   | 0.495   | 0.528   |
|                                            | A+T%     | 68.424         | 67.260         | 69.340  | 71.860  | 68.810  | 66.220  | 65.240  | 65.130  | 65.240  | 64.850  | 70.150  | 72.730  | 67.730  | 71.120  | 69.480  | 73.560  | 68.900  |

|                              | A-T skew | -0.367 | -0.455 | -0.156 | -0.289 | -0.381 | -0.462 | -0.489 | -0.368 | -0.489 | -0.511 | -0.500 | -0.458 | -0.431 | -0.418 | -0.438 | -0.494 | -0.495 |
|------------------------------|----------|--------|--------|--------|--------|--------|--------|--------|--------|--------|--------|--------|--------|--------|--------|--------|--------|--------|
|                              | G+C%     | 31.576 | 58.390 | 30.580 | 27.490 | 31.190 | 33.780 | 34.770 | 34.870 | 34.770 | 35.140 | 29.620 | 27.270 | 32.280 | 28.880 | 30.520 | 26.440 | 31.110 |
|                              | G-C skew | 0.404  | 0.676  | 0.401  | 0.457  | 0.517  | 0.449  | 0.393  | 0.438  | 0.393  | 0.381  | 0.472  | 0.778  | 0.350  | 0.522  | 0.426  | 0.339  | 0.484  |
|                              | A+T%     | 68.600 | 67.690 | 68.510 | 72.030 | 69.000 | 65.760 | 63.240 | 64.990 | 65.370 | 65.410 | 70.060 | 71.720 | 67.970 | 68.730 | 66.860 | 72.810 | 70.820 |
| <i>Toxocara canis</i>        | A-T skew | -0.362 | -0.395 | -0.153 | -0.293 | -0.420 | -0.467 | -0.429 | -0.371 | -0.490 | -0.503 | -0.497 | -0.452 | -0.433 | -0.494 | -0.103 | -0.500 | -0.406 |
|                              | G+C%     | 31.400 | 32.310 | 31.490 | 27.970 | 30.800 | 34.240 | 36.760 | 35.010 | 34.640 | 34.590 | 29.940 | 28.270 | 32.030 | 31.270 | 33.140 | 27.190 | 29.190 |
|                              | G-C skew | 0.401  | 0.414  | 0.411  | 0.448  | 0.487  | 0.446  | 0.379  | 0.432  | 0.398  | 0.384  | 0.462  | 0.726  | 0.345  | 0.476  | 0.351  | 0.322  | 0.500  |
|                              | A+T%     | 69.948 | 70.820 | 70.190 | 71.530 | 70.188 | 68.200 | 64.510 | 67.510 | 67.320 | 67.010 | 70.980 | 73.510 | 68.210 | 72.850 | 71.430 | 74.940 | 70.230 |
| <i>Toxocara cati</i>         | A-T skew | -0.363 | -0.406 | -0.135 | -0.219 | -0.466 | -0.430 | -0.415 | -0.312 | -0.466 | -0.477 | -0.506 | -0.449 | -0.445 | -0.432 | -0.434 | -0.479 | -0.476 |
|                              | G+C%     | 30.052 | 29.190 | 29.800 | 28.470 | 29.812 | 31.800 | 35.480 | 32.480 | 32.690 | 32.990 | 29.030 | 26.490 | 31.790 | 27.160 | 28.570 | 25.060 | 29.770 |
|                              | G-C skew | 0.392  | 0.500  | 0.387  | 0.404  | 0.349  | 0.397  | 0.339  | 0.403  | 0.355  | 0.396  | 0.510  | 0.730  | 0.304  | 0.524  | 0.416  | 0.413  | 0.461  |
|                              | A+T%     | 68.900 | 68.150 | 70.290 | 70.050 | 68.900 | 65.130 | 64.390 | 65.120 | 66.020 | 66.670 | 71.680 | 71.730 | 67.310 | 72.850 | 70.100 | 74.940 | 69.400 |
| <i>Toxocara malay-siensi</i> | A-T skew | -0.370 | -0.396 | -0.116 | -0.345 | -0.422 | -0.473 | -0.422 | -0.382 | -0.475 | -0.471 | -0.488 | -0.411 | -0.437 | -0.467 | -0.455 | -0.491 | -0.494 |
|                              | G+C%     | 31.200 | 31.850 | 29.720 | 29.950 | 30.600 | 34.870 | 35.610 | 34.880 | 33.990 | 33.330 | 28.320 | 28.270 | 32.680 | 27.150 | 29.890 | 25.060 | 30.600 |
|                              | G-C skew | 0.410  | 0.420  | 0.392  | 0.440  | 0.444  | 0.435  | 0.354  | 0.444  | 0.410  | 0.389  | 0.456  | 0.726  | 0.338  | 0.587  | 0.455  | 0.413  | 0.530  |
|                              | A+T%     | 69.942 | 66.930 | 68.980 | 72.220 | 68.116 | 65.940 | 65.460 | 66.240 | 67.450 | 64.720 | 68.280 | 70.830 | 66.590 | 72.850 | 72.100 | 71.030 | 67.060 |
| <i>Toxocara vitulo-rum</i>   | A-T skew | -0.370 | -0.488 | -0.164 | -0.315 | -0.375 | -0.515 | -0.440 | -0.394 | -0.506 | -0.526 | -0.529 | -0.488 | -0.482 | -0.456 | -0.533 | -0.540 | -0.526 |
|                              | G+C%     | 30.058 | 33.070 | 30.940 | 27.780 | 31.884 | 34.050 | 34.540 | 33.750 | 32.550 | 35.280 | 31.710 | 29.160 | 33.420 | 27.150 | 27.900 | 28.970 | 32.940 |
|                              | G-C skew | 0.445  | 0.458  | 0.410  | 0.426  | 0.470  | 0.501  | 0.359  | 0.487  | 0.480  | 0.422  | 0.478  | 0.776  | 0.406  | 0.619  | 0.533  | 0.397  | 0.523  |
|                              | A+T%     | 68.900 | 68.150 | 70.290 | 70.050 | 68.900 | 65.130 | 64.390 | 65.120 | 66.020 | 66.670 | 71.680 | 71.730 | 67.310 | 72.850 | 70.100 | 74.940 | 69.400 |
