# Supplementary material for: The Complete Mitogenome of Toxocara vitulorum: Novel In-Sights into the Phylogenetics in Toxocaridae
Source: MDPI journal article supplement (doi:10.3390/ani12243546), 2022-12-15
Supplement: s1 [file s1]

**Table S3.** Lengths of each PCG and rRNA in *Toxocara vitulorum* and other nematodes reported within Ascaridida

| Species                         | atp6 | cox1 | cox2 | cox3 | cytb | nad1 | nad2 | nad3 | nad4 | nad4L | nad5 | nad6 | rrnS |
|---------------------------------|------|------|------|------|------|------|------|------|------|-------|------|------|------|
| <i>Ascaridia</i> sp. GHL-2013   | 597  | 1561 | 687  | 751  | 1101 | 870  | 837  | 339  | 1230 | 217   | 1575 | 435  | 691  |
| <i>Anisakis simplex</i> (s.l)   | 600  | 1576 | 699  | 755  | 1099 | 873  | 846  | 336  | 1230 | 232   | 1582 | 435  | 699  |
| <i>Anisakis simplex</i> (s.s)   | 600  | 1576 | 699  | 764  | 1101 | 876  | 846  | 336  | 1230 | 232   | 1582 | 435  | 700  |
| <i>Ascaridia columbae</i>       | 597  | 1563 | 696  | 745  | 1101 | 876  | 843  | 336  | 1236 | 217   | 1581 | 435  | 703  |
| <i>Ascaridia galli</i>          | 597  | 1563 | 699  | 745  | 1104 | 876  | 843  | 336  | 1236 | 217   | 1581 | 435  | 701  |
| <i>Ascaris lumbricoides</i>     | 600  | 1578 | 699  | 777  | 1098 | 873  | 844  | 336  | 1230 | 234   | 1585 | 435  | 703  |
| <i>Ascaris lumbricoides</i>     | 600  | 1578 | 699  | 768  | 1098 | 873  | 844  | 336  | 1230 | 234   | 1585 | 435  | 700  |
| <i>Ascaris</i> sp.(cA.)         | 600  | 1577 | 699  | 777  | 1098 | 873  | 844  | 336  | 1230 | 234   | 1585 | 435  | 700  |
| <i>Ascaris</i> sp.(gA.)         | 600  | 1577 | 699  | 777  | 1098 | 873  | 844  | 336  | 1230 | 234   | 1585 | 435  | 700  |
| <i>Ascaris suum</i>             | 600  | 1578 | 699  | 777  | 1098 | 873  | 844  | 336  | 1230 | 234   | 1585 | 435  | 699  |
| <i>Ascaris suum</i>             | 600  | 1577 | 699  | 768  | 1098 | 873  | 844  | 336  | 1230 | 234   | 1585 | 435  | 701  |
| <i>Baylisascaris procyonis</i>  | 600  | 1578 | 699  | 768  | 1107 | 873  | 844  | 336  | 1230 | 234   | 1585 | 435  | 700  |
| <i>Baylisascaris schroederi</i> | 600  | 1578 | 699  | 768  | 1107 | 873  | 844  | 336  | 1230 | 234   | 1585 | 435  | 694  |
| <i>Baylisascaris transfuga</i>  | 600  | 1578 | 699  | 768  | 1107 | 873  | 844  | 336  | 1230 | 234   | 1585 | 435  | 694  |
| <i>Heterakis beramporia</i>     | 600  | 1563 | 696  | 766  | 1128 | 876  | 843  | 334  | 1230 | 234   | 1581 | 432  | 699  |
| <i>Heterakis gallinarum</i>     | 597  | 1563 | 696  | 767  | 1128 | 876  | 843  | 334  | 1230 | 234   | 1581 | 432  | 699  |
| <i>Parascaris equorum</i>       | 600  | 1578 | 699  | 768  | 1104 | 876  | 844  | 336  | 1230 | 234   | 1585 | 435  | 700  |
| <i>Parascaris univalens</i>     | 600  | 1569 | 699  | 768  | 1095 | 876  | 850  | 336  | 1230 | 234   | 1582 | 435  | 702  |
| <i>Pseudoterranova azarasi</i>  | 600  | 1576 | 702  | 766  | 1102 | 873  | 846  | 336  | 1230 | 232   | 1584 | 435  | 702  |
| <i>Pseudoterranova cattani</i>  | 600  | 1576 | 702  | 766  | 1102 | 873  | 846  | 336  | 1230 | 232   | 1584 | 435  | 702  |
| <i>Pseudoterranova krabbei</i>  | 600  | 1576 | 702  | 766  | 1102 | 873  | 846  | 336  | 1230 | 232   | 1584 | 435  | 702  |
| <i>Pseudoterranova bulbosa</i>  | 600  | 1576 | 702  | 766  | 1102 | 873  | 846  | 336  | 1230 | 232   | 1584 | 435  | 702  |
| <i>Toxascaris leonine</i>       | 600  | 1578 | 699  | 768  | 1095 | 873  | 844  | 336  | 1230 | 234   | 1582 | 435  | 700  |
| <i>Toxascaris leonine</i>       | 600  | 1578 | 699  | 768  | 1095 | 873  | 844  | 336  | 1230 | 234   | 1582 | 435  | 700  |
| <i>Toxocara canis</i>           | 598  | 1578 | 714  | 768  | 1107 | 882  | 844  | 330  | 1230 | 232   | 1576 | 435  | 693  |
| <i>Toxocara canis</i>           | 598  | 1578 | 714  | 768  | 1107 | 873  | 845  | 336  | 1230 | 233   | 1582 | 434  | 697  |
| <i>Toxocara cati</i>            | 598  | 1578 | 711  | 768  | 1107 | 873  | 844  | 336  | 1230 | 232   | 1582 | 435  | 696  |
| <i>Toxocara malaysiensis</i>    | 598  | 1581 | 711  | 768  | 1107 | 873  | 844  | 336  | 1230 | 232   | 1582 | 435  | 696  |
| <i>Toxocara vitulorum</i>       | 598  | 1581 | 717  | 768  | 1107 | 873  | 845  | 336  | 1230 | 232   | 1582 | 435  | 688  |
