# Supplementary material for: The Complete Mitogenome of Toxocara vitulorum: Novel In-Sights into the Phylogenetics in Toxocaridae
Source: Animals (Basel). 2022 Dec 15;12(24):3546. doi: 10.3390/ani12243546 (PMC9774135; doi:10.3390/ani12243546)
Supplement: Supplementary file 1 [file animals-12-03546-s001.zip]

Archive with 4 entries (4 files):
- Figures S1-S2.pdf
- Table  S1.pdf
- Table  S2.pdf
- Table  S3.pdf
